# Supplementary material for: The protein content of seaweeds: a universal nitrogen-to-protein conversion factor of five
Source: Springer Nature journal article supplement (doi:10.1007/s10811-015-0650-1), 2015-06-29
Supplement: MOESM9 [file 10811_2015_650_MOESM9_ESM.docx]

**Appendix 1.** Additional articles included in meta-analysis that were not retrieved by search string as well as the list of all articles examined in qualitative and quantitative meta-analysis.

**Additional articles included in the meta-analysis that were not retrieved by search string (n = 17)**

(Dawes et al. 1974; Rosell and Srivastava 1985; Kopczak et al. 1991; Hurtadoponce 1995; Navarro-Angulo and Robledo 1999; Ramos et al. 2000; Lourenço et al. 2002; Orduna-Rojas et al. 2002; Zubia et al. 2003; Boulus et al. 2007; Chakraborty and Santra 2008; Angell et al. 2012; Pereira et al. 2012a; Westermeier et al. 2012; Cazon et al. 2014; Liu et al. 2014; Neveux et al. 2014)

**Articles included in qualitative meta-analysis only (n = 31)**

(Kopczak et al. 1991; Mcglathery 1992; Vergara and Niell 1993, 1995; Hernandez 1996; Kennish 1997; Rico and Fernandez 1997; Sturm and Horn 1998; Jayasankar and Kulandaivelu 1999; Mercado et al. 1999; Costanzo et al. 2000; Bischof et al. 2006; Gordillo et al. 2006; Dworjanyn et al. 2007; Margret et al. 2008; Martins et al. 2008; Zou and Gao 2009; Martins et al. 2011; Ramlov et al. 2011; Moreda-Pineiro et al. 2012; Romaris-Hortas et al. 2012; Yildiz et al. 2012; Ben Chekroun et al. 2013; Garcia-Sartal et al. 2013; Gouveia et al. 2013; Kim et al. 2013; Ribeiro et al. 2013; Kumari et al. 2014; Misurcova et al. 2014; Yildiz et al. 2014; Zou and Gao 2014)

**Articles included in quantitative and qualitative meta-analysis (n = 205)**

(Dawes et al. 1974; Horn and Neighbors 1984; Rosell and Srivastava 1985; Buchsbaum et al. 1991; Duffy and Hay 1991; Neighbors and Horn 1991; Mercer et al. 1993; Mouradigivernaud et al. 1993; Lightfoot and Raghavan 1994; Mai et al. 1994; Figueroa et al. 1995; Gomez and Westermeier 1995; Hurtadoponce 1995; Vergara et al. 1995; Bolser and Hay 1996; Castro-Gonzalez et al. 1996; Cronin and Hay 1996c, a, b; Kaehler and Kennish 1996; McGlathery et al. 1996; Rico and Fernandez 1996; Shpigel et al. 1996; Smit et al. 1996; Westermeier and Gomez 1996; Chan et al. 1997; Davies et al. 1997; Renaud et al. 1997; Robledo and Pelegrin 1997; Wahbeh 1997; Foster and Hodgson 1998; Gojon-Baez et al. 1998; Gomez et al. 1998; Gomez and Wiencke 1998; Rijstenbil et al. 1998; Ventura and Castanon 1998; Andria et al. 1999; Bautista-Teruel and Millamena 1999; Galland-Irmouli et al. 1999; Gunnarsson et al. 1999; McGlathery and Pedersen 1999; Naldi and Wheeler 1999; Navarro-Angulo and Robledo 1999; Shpigel et al. 1999; Cruz-Rivera and Hay 2000; Norziah and Ching 2000; Ramos et al. 2000; Rosen et al. 2000; Vadas et al. 2000; Wong and Cheung 2000; Bautista-Teruel et al. 2001; Boarder and Shpigel 2001; Cruz-Rivera and Hay 2001; Gordillo et al. 2001; Granado and Caballero 2001; Liu and Dong 2001; Ruperez and Saura-Calixto 2001; Wong and Cheung 2001a; Wong and Cheung 2001b; Goni et al. 2002; Lourenço et al. 2002; Martinez and Rico 2002; Orduna-Rojas et al. 2002; Dere et al. 2003; Marrion et al. 2003; McDermid and Stuercke 2003; Neori et al. 2003; Reyes and Fermin 2003; Risso et al. 2003; Sanchez-Machado et al. 2003; Schuenhoff et al. 2003; Zubia et al. 2003; Barile et al. 2004; Hemmi and Jormalainen 2004; Rodde et al. 2004; Sanchez-Machado et al. 2004; Aguilera-Morales et al. 2005; Barbarino and Lourenco 2005; Fayaz et al. 2005; Israel et al. 2005; Mamelona and Pelletier 2005; Marrion et al. 2005; Peters et al. 2005; Viera et al. 2005; Freile-Pelegrin and Robledo 2006; Jacquin et al. 2006; Lartigue and Sherman 2006; Marinho-Soriano et al. 2006; Ortiz et al. 2006; Renaud and Luong-Van 2006; Valente et al. 2006; Boulus et al. 2007; Cook and Kelly 2007; Dawczynski et al. 2007; Hong et al. 2007; Mallo et al. 2007; Mamatha et al. 2007; Marsham et al. 2007; McDermid et al. 2007; Wang et al. 2007; Chakraborty and Santra 2008; Cho et al. 2008; Hwang et al. 2008; Msuya and Neori 2008; Nelson et al. 2008; Polat and Ozogul 2008; Yu and Yang 2008; Banerjee et al. 2009; Cruz-Suarez et al. 2009; de Oliveira et al. 2009; Hernandez-Carmona et al. 2009; Hernandez et al. 2009; Matanjun et al. 2009; Ortiz et al. 2009; Cho et al. 2010; Cirik et al. 2010; Cofrades et al. 2010; Cruz-Suarez et al. 2010; Denis et al. 2010; Gomez-Ordonez et al. 2010; Gressler et al. 2010; Ktita et al. 2010; Kumar et al. 2010; Misurcova et al. 2010; Msuya and Neori 2010; Schaal et al. 2010; Smith et al. 2010; Taboada et al. 2010; Zhang et al. 2010; Akkoz et al. 2011; Asino et al. 2011; Badrinathan et al. 2011; Chen 2011; Diniz et al. 2011; Duarte et al. 2011; Frikha et al. 2011; Gressler et al. 2011; Murakami et al. 2011; Nguyen et al. 2011; Patarra et al. 2011; Pato et al. 2011; Pena-Rodriguez et al. 2011; Perez-Estrada et al. 2011; Senthil et al. 2011; Viera et al. 2011; Xu et al. 2011; Yaich et al. 2011; Yildiz et al. 2011; Al-Harthi and El-Deek 2012; Ambreen et al. 2012; Angell et al. 2012; Bilbao et al. 2012; Cho and Kim 2012; Eddy et al. 2012; El Din and El-Sherif 2012; Hofmann et al. 2012; Kandasamy et al. 2012; Madden et al. 2012; Nielsen et al. 2012; Pereira et al. 2012a; Pereira et al. 2012b; Pise et al. 2012; Prado et al. 2012; Rohani-Ghadikolaei et al. 2012; Suarez-Alvarez et al. 2012; Sun et al. 2012; Tabarsa et al. 2012a; Tabarsa et al. 2012b; Westermeier et al. 2012; Borell et al. 2013; Francavilla et al. 2013; Jard et al. 2013; Khairy and El-Shafay 2013; Marinho et al. 2013; Mulvaney et al. 2013; Munier et al. 2013; Peng et al. 2013; Polat and Ozogul 2013; Shuuluka et al. 2013; Stadtlander et al. 2013; Taboada et al. 2013; Teichberg et al. 2013; Trigui et al. 2013; Uslu et al. 2013; Wassef et al. 2013; Yu et al. 2013; Angell et al. 2014; Astorga-Espana and Mansilla 2014; Baghel et al. 2014; Baumgartner et al. 2014; Blanco-Pascual et al. 2014; Cazon et al. 2014; Cian et al. 2014; Duarte et al. 2014; Hafezieh et al. 2014; Johnson et al. 2014; Liu et al. 2014; Manns et al. 2014; Neveux et al. 2014; O'Mahoney et al. 2014; Orozco et al. 2014; Paiva et al. 2014; Turan and Tekogul 2014; You et al. 2014; Yu et al. 2014)

Aguilera-Morales M, Casas-Valdez M, Carrillo-Dominguez B, Gonzalez-Acosta B, Perez-Gil F (2005) Chemical composition and microbiological assays of marine algae *Enteromorpha* spp. as a potential food source. J Food Compos Anal 18 (1):79-88

Akkoz C, Arslan D, Unver A, Ozcan MM, Yilmaz B (2011) Chemical Composition, Total Phenolic and Mineral Contents of *Enteromorpha* *intestinalis* (L.) Kutz. And *Cladophora* *glomerata* (L.) Kutz. Seaweeds. J Food Biochem 35 (2):513-523

Al-Harthi MA, El-Deek AA (2012) Nutrient profiles of brown marine algae (*Sargassum* *dentifebium*) as affected by different processing methods for chickens. J Food Agric Env 10 (1):475-480

Ambreen, Hira K, Tariq A, Ruqqia, Sultana V, Ara J (2012) Evaluation of Biochemical Component and Antimicrobial Activity of Some Seaweeeds Occurring at Karachi Coast. Pak J Bot 44 (5):1799-1803

Andria JR, Vergara JJ, Perez-Llorens JL (1999) Biochemical responses and photosynthetic performance of *Gracilaria* sp (Rhodophyta) from Cadiz, Spain, cultured under different inorganic carbon and nitrogen levels. Eur J Phycol 34 (5):497-504

Angell AR, Mata L, de Nys R, Paul NA (2014) Variation in amino acid content and its relationship to nitrogen content and growth rate in *Ulva ohnoi* (Chlorophyta). J Phycol 50 (1):216-226

Angell AR, Pirozzi I, de Nys R, Paul NA (2012) Feeding Preferences and the Nutritional Value of Tropical Algae for the Abalone *Haliotis asinina*. Plos One 7 (6)

Asino H, Ai QH, Mai KS (2011) Evaluation of *Enteromorpha prolifera* as a feed component in large yellow croaker (*Pseudosciaena crocea*, Richardson, 1846) diets. Aquac Res 42 (4):525-533

Astorga-Espana MS, Mansilla A (2014) Sub-Antarctic macroalgae: opportunities for gastronomic tourism and local fisheries in the Region of Magallanes and Chilean Antarctic Territory. J Appl Phycol 26 (2):973-978

Badrinathan S, Suneeva SC, Shiju TM, Kumar CPG, Pragasam V (2011) Exploration of a novel hydroxyl radical scavenger from *Sargassum myriocystum*. Journal of Medicinal Plants Research 5 (10):1997-2005

Baghel RS, Reddy CRK, Jha B (2014) Characterization of agarophytic seaweeds from the biorefinery context. Bioresour Technol 159:280-285

Banerjee K, Ghosh R, Homechaudhuri S, Mitra A (2009) Seasonal variation in the biochemical composition of red seaweed (*Catenella repens*) from Gangetic delta, northeast coast of India. Journal of Earth System Science 118 (5):497-505

Barbarino E, Lourenco SO (2005) An evaluation of methods for extraction and quantification of protein from marine macro- and microalgae. J Appl Phycol 17 (5):447-460

Barile PJ, Lapointe BE, Capo TR (2004) Dietary nitrogen availability in macroalgae enhances growth of the sea hare *Aplysia californica* (Opisthobranchia : Anaspidea). J Exp Mar Biol Ecol 303 (1):65-78

Baumgartner FA, Pavia H, Toth GB (2014) Individual Specialization to Non-Optimal Hosts in a Polyphagous Marine Invertebrate Herbivore. Plos One 9 (8)

Bautista-Teruel MN, Millamena OM (1999) Diet development and evaluation for juvenile abalone, *Haliotis asinina*: protein energy levels. Aquaculture 178 (1-2):117-126

Bautista-Teruel MN, Millamena OM, Fermin AC (2001) Reproductive performance of hatchery-bred donkey's ear abalone, *Haliotis asinina*, Linne, fed natural and artificial diets. Aquac Res 32:249-254

Ben Chekroun K, Moumen A, Rezzoum N, Sanchez E, Baghour M (2013) Role of macroalgae in biomonitoring of pollution in "Marchica", the Nador lagoon. Phyton-International Journal of Experimental Botany 82:31-34

Bilbao A, Uriarte I, Viera MD, Sosa B, Fernandez-Palacios H, Hernandez-Cruz CM (2012) Effect of Macroalgae Protein Levels on Some Reproductive Aspects and Physiological Parameters for the Abalone, *Haliotis tuberculata* *coccinea* (Reeve 1846). J World Aquacult Soc 43 (6):764-777

Bischof K, Rautenberger R, Brey L, Perez-Llorens JL (2006) Physiological acclimation to gradients of solar irradiance within mats of the filamentous green macroalga *Chaetomorpha linum* from southern Spain. Mar Ecol Prog Ser 306:165-175

Blanco-Pascual N, Montero MP, Gomez-Guillen MC (2014) Antioxidant film development from unrefined extracts of brown seaweeds *Laminaria* *digitata* and *Ascophyllum nodosum*. Food Hydrocoll 37:100-110

Boarder SJ, Shpigel M (2001) Comparative performances of juvenile *Haliotis roei* fed on enriched *Ulva rigida* and various artificial diets. J Shellfish Res 20 (2):653-657

Bolser RC, Hay ME (1996) Are tropical plants better defended? Palatability and defenses of temperate vs tropical seaweeds. Ecology 77 (8):2269-2286

Borell EM, Steinke M, Fine M (2013) Direct and indirect effects of high pCO(2) on algal grazing by coral reef herbivores from the Gulf of Aqaba (Red Sea). Coral Reefs 32 (4):937-947

Boulus A, Spaneir E, Friedlander M (2007) Effect of outdoor conditions on growth rate and chemical composition of *Gelidium crinale* in culture. J Appl Phycol 19 (5):471-478

Buchsbaum R, Valiela I, Swain T, Dzierzeski M, Allen S (1991) Available and Refractory Nitrogen in Detritus of Coastal Vascular Plants and Macroalgae. Mar Ecol Prog Ser 72 (1-2):131-143

Castro-Gonzalez MI, Romo FPG, PerezEstrella S, CarrilloDominguez S (1996) Chemical composition of the green alga *Ulva lactuca*. Cienc Mar 22 (2):205-213

Cazon JP, Viera M, Sala S, Donati E (2014) Biochemical characterization of *Macrocystis pyrifera* and *Undaria pinnatifida* (Phaeophyceae) in relation to their potentiality as biosorbents. Phycologia 53 (1):100-108

Chakraborty S, Santra SC (2008) Biochemical composition of eight benthic algae collected from Sunderban. Indian J Mar Sci 37 (3):329-332

Chan JCC, Cheung PCK, Ang PO (1997) Comparative studies on the effect of three drying methods on the nutritional composition of seaweed *Sargassum hemiphyllum* (Turn) C Ag. J Agric Food Chem 45 (8):3056-3059

Chen YC (2011) The Hormesis of the Green Macroalga *Ulva Fasciata* with Low-Dose (60)Cobalt Gamma Radiation. J Phycol 47 (4):939-943

Cho M, Yang C, Kim SM, You S (2010) Molecular characterization and biological activities of watersoluble sulfated polysaccharides from *Enteromorpha prolifera*. Food Science and Biotechnology 19 (2):525-533

Cho SH, Kim DS (2012) Effects of Feed Type and Temperature on Growth of Juvenile Abalone, *Haliotis discus* *hannai* Ino. J World Aquacult Soc 43 (1):114-119

Cho SH, Park J, Kim C, Yoo JH (2008) Effect of casein substitution with fishmeal, soybean meal and crustacean meal in the diet of the abalone *Haliotis* *discus* *hannai* Ino. Aquac Nutr 14 (1):61-66

Cian RE, Fajardo MA, Alaiz M, Vioque J, Gonzalez RJ, Drago SR (2014) Chemical composition, nutritional and antioxidant properties of the red edible seaweed *Porphyra* *columbina*. Int J Food Sci Nutr 65 (3):299-305

Cirik S, Cetin Z, Ak I, Cirik S, Goksan T (2010) Greenhouse Cultivation of *Gracilaria verrucosa* (Hudson) Papenfuss and Determination of Chemical Composition. Turk J Fish Aquat Sci 10 (4):559-564

Cofrades S, Lopez-Lopez I, Bravo L, Ruiz-Capillas C, Bastida S, Larrea MT, Jimenez-Colmenero F (2010) Nutritional and Antioxidant Properties of Different Brown and Red Spanish Edible Seaweeds. Food Sci Technol Int 16 (5):361-370

Cook EJ, Kelly MS (2007) Effect of variation in the protein value of the red macroalga Palmaria palmata on the feeding, growth and gonad composition of the sea urchins *Psammechinus* *miliaris* and *Paracentrotus lividus* (Echinodermata). Aquaculture 270 (1-4):207-217

Costanzo SD, O'Donohue MJ, Dennison WC (2000) Gracilaria edulis (Rhodophyta) as a biological indicator of pulsed nutrients in oligotrophic waters. J Phycol 36 (4):680-685

Cronin G, Hay ME (1996a) Effects of light and nutrient availability on the growth, secondary chemistry, and resistance to herbivory of two brown seaweeds. Oikos 77 (1):93-106

Cronin G, Hay ME (1996b) Induction of seaweed chemical defenses by amphipod grazing. Ecology 77 (8):2287-2301

Cronin G, Hay ME (1996c) Within plant variation in seaweed palatability and chemical defenses: Optimal defense theory versus the growth differentiation balance hypothesis. Oecologia 105 (3):361-368

Cruz-Rivera E, Hay ME (2000) Can quantity replace quality? Food choice, compensatory feeding, and fitness of marine mesograzers. Ecology 81 (1):201-219

Cruz-Rivera E, Hay ME (2001) Macroalgal traits and the feeding and fitness of an herbivorous amphipod: the roles of selectivity, mixing, and compensation. Mar Ecol Prog Ser 218:249-266

Cruz-Suarez LE, Leon A, Pena-Rodriguez A, Rodriguez-Pena G, Moll B, Ricque-Marie D (2010) Shrimp/*Ulva* co-culture: A sustainable alternative to diminish the need for artificial feed and improve shrimp quality. Aquaculture 301 (1-4):64-68

Cruz-Suarez LE, Tapia-Salazar M, Nieto-Lopez MG, Guajardo-Barbosa C, Ricque-Marie D (2009) Comparison of *Ulva clathrata* and the kelps *Macrocystis* *pyrifera* and *Ascophyllum* *nodosum* as ingredients in shrimp feeds. Aquac Nutr 15 (4):421-430

Davies SJ, Brown MT, Camilleri M (1997) Preliminary assessment of the seaweed *Porphyra* *purpurea* in artificial diets for thick-lipped grey mullet (*Chelon* *labrosus*). Aquaculture 152 (1-4):249-258

Dawczynski C, Schubert R, Jahreis G (2007) Amino acids, fatty acids, and dietary fibre in edible seaweed products. Food Chem 103 (3):891-899

Dawes CJ, Lawrence JM, Cheney DP, Mathieso.Ac (1974) Ecological Studies of Floridian *Eucheuma* (Rhodophyta, Gigartinales) .3. Seasonal Variation of Carrageenan, Total Carbohydrate, Protein, and Lipid. Bull Mar Sci 24 (2):286-299

de Oliveira MN, Freitas ALP, Carvalho AFU, Sarnpaio TMT, Farias DF, Teixeira DIA, Gouveia ST, Pereira JG, de Sena MMDC (2009) Nutritive and non-nutritive attributes of washed-up seaweeds from the coast of Ceara, Brazil. Food Chem 115 (1):254-259

Denis C, Morancais M, Li M, Deniaud E, Gaudin P, Wielgosz-Collin G, Barnathan G, Jaouen P, Fleurence J (2010) Study of the chemical composition of edible red macroalgae *Grateloupia* *turuturu* from Brittany (France). Food Chem 119 (3):913-917

Dere S, Dalkiran N, Karacaoglu D, Yildiz G, Dere E (2003) The determination of total protein, total soluble carbohydrate and pigment contents of some macroalgae collected from Gemlik-Karacaali (Bursa) and Erdek-Ormanli (Balikesir) in the Sea of Marmara, Turkey. Oceanologia 45 (3):453-471

Diniz GS, Barbarino E, Oiano-Neto J, Pacheco S, Lourenco SO (2011) Gross Chemical Profile and Calculation of Specific Nitrogen-to-Protein Conversion Factors for Five Tropical Seaweeds. American Journal of Plant Sciences 2:287-296

Duarte C, Acuna K, Navarro JM, Gomez I (2011) Intra-plant differences in seaweed nutritional quality and chemical defenses: Importance for the feeding behavior of the intertidal amphipod *Orchestoidea* *tuberculata*. J Sea Res 66 (3):215-221

Duarte C, Acuna K, Navarro JM, Gomez I, Jaramillo E, Quijon P (2014) Variable feeding behavior in *Orchestoidea* *tuberculata* (Nicolet 1849): Exploring the relative importance of macroalgal traits. J Sea Res 87:1-7

Duffy JE, Hay ME (1991) Food and Shelter as Determinants of Food Choice by an Herbivorous Marine Amphipod. Ecology 72 (4):1286-1298

Dworjanyn SA, Pirozzi I, Liu WS (2007) The effect of the addition of algae feeding stimulants to artificial diets for the sea urchin *Tripneustes* *gratilla*. Aquaculture 273 (4):624-633

Eddy SD, Brown NP, Kling AL, Watts SA, Lawrence A (2012) Growth of Juvenile Green Sea Urchins, *Strongylocentrotus* *droebachiensis*, Fed Formulated Feeds with Varying Protein Levels Compared with a Macroalgal Diet and a Commercial Abalone Feed. J World Aquacult Soc 43 (2):159-173

El Din NGS, El-Sherif Z (2012) Nutritional value of some algae from the north-western Mediterranean coast of Egypt. J Appl Phycol 24 (3):613-626

Fayaz M, Namitha KK, Murthy KNC, Swamy MM, Sarada R, Khanam S, Subbarao PV, Ravishankar GA (2005) Chemical composition, iron bioavailability, and antioxidant activity of *Kappaphycus* *alvarezzi* (Doty). J Agric Food Chem 53 (3):792-797

Figueroa FL, Aguilera J, Jimenez C, Vergara JJ, Robles MD, Niell FX (1995) Growth, pigment synthesis and nitrogen assimilation in the red alga *Porphyra* sp (Bangiales, Rhodophyta) under blue and red light. Sci Mar 59:9-20

Foster GG, Hodgson AN (1998) Consumption and apparent dry matter digestibility of six intertidal macroalgae by *Turbo* *sarmaticus* (Mollusca : Vetigastropoda : Turbinidae). Aquaculture 167 (3-4):211-227

Francavilla M, Franchi M, Monteleone M, Caroppo C (2013) The Red Seaweed *Gracilaria* *gracilis* as a Multi Products Source. Marine Drugs 11 (10):3754-3776

Freile-Pelegrin Y, Robledo D (2006) Carrageenan of *Eucheuma* *isiforme* (Solieriaceae Rhodophyta) from Yucatan, Mexico. II. Seasonal variations in carrageenan and biochemical characteristics. Bot Mar 49 (1):72-78

Frikha F, Kammoun M, Hammami N, Mchirgui RA, Belbahri L, Gargouri Y, Miled N, Ben-Rebah F (2011) Chemical composition and some biological activities of marine algae collected in Tunisia. Cienc Mar 37 (2):113-124

Galland-Irmouli AV, Fleurence J, Lamghari R, Lucon M, Rouxel C, Barbaroux O, Bronowicki JP, Villaume C, Gueant JL (1999) Nutritional value of proteins from edible seaweed *Palmaria* *palmata* (Dulse). J Nutr Biochem 10 (6):353-359

Garcia-Sartal C, Barciela-Alonso MD, Moreda-Pineiro A, Bermejo-Barrera P (2013) Study of cooking on the bioavailability of As, Co, Cr, Cu, Fe, Ni, Se and Zn from edible seaweed. Microchem J 108:92-99

Gojon-Baez HH, Siqueiros-Beltrones DA, Hernandez-Contreras H (1998) In situ ruminal digestibility and degradability of *Macrocystis* *pyrifera* and *Sargassum* spp. in bovine livestock. Cienc Mar 24 (4):463-481

Gomez-Ordonez E, Jimenez-Escrig A, Ruperez P (2010) Dietary fibre and physicochemical properties of several edible seaweeds from the northwestern Spanish coast. Food Res Int 43 (9):2289-2294

Gomez I, Westermeier R (1995) Energy Contents and Organic-Constituents in Antarctic and South Chilean Marine Brown-Algae. Polar Biol 15 (8):597-602

Gomez I, Weykam G, Wiencke C (1998) Photosynthetic metabolism and major organic compounds in the marine brown alga *Desmarestia* *menziesii* from King George Island (Antarctica). Aquat Bot 60 (2):105-118

Gomez I, Wiencke C (1998) Seasonal changes in C, N and major organic compounds and their significance to morpho-functional processes in the endemic Antarctic brown alga *Ascoseira* *mirabilis*. Polar Biol 19 (2):115-124

Goni I, Gudiel-Urbano M, Saura-Calixto F (2002) In vitro determination of digestible and unavailable protein in edible seaweeds. J Sci Food Agric 82 (15):1850-1854

Gordillo FJL, Aguilera J, Jimenez C (2006) The response of nutrient assimilation and biochemical composition of Arctic seaweeds to a nutrient input in summer. J Exp Bot 57 (11):2661-2671

Gordillo FJL, Niell FX, Figueroa FL (2001) Non-photosynthetic enhancement of growth by high CO2 level in the nitrophilic seaweed *Ulva rigida* C. Agardh (Chlorophyta). Planta 213 (1):64-70

Gouveia C, Kreusch M, Schmidt EC, Felix MRD, Osorio LKP, Pereira DT, dos Santos R, Ouriques LC, Martins RD, Latini A, Ramlov F, Carvalho TJG, Chow F, Maraschin M, Bouzon ZL (2013) The Effects of Lead and Copper on the Cellular Architecture and Metabolism of the Red Alga *Gracilaria domingensis*. Microsc Microanal 19 (3):513-524

Granado I, Caballero P (2001) Feeding rates of *Littorina striata* and *Osilinus atratus* in relation to nutritional quality and chemical defenses of seaweeds. Marine Biology 138 (6):1213-1224

Gressler V, Fujii MT, Martins AP, Colepicolo P, Mancini J, Pinto E (2011) Biochemical composition of two red seaweed species grown on the Brazilian coast. J Sci Food Agric 91 (9):1687-1692

Gressler V, Yokoya NS, Fujii MT, Colepicolo P, Mancini J, Torres RP, Pinto E (2010) Lipid, fatty acid, protein, amino acid and ash contents in four Brazilian red algae species. Food Chem 120 (2):585-590

Gunnarsson JS, Granberg ME, Nilsson HC, Rosenberg R, Hellman B (1999) Influence of sediment-organic matter quality on growth and polychlorobiphenyl bioavailability in echinodermata (*Amphiura filiformis*). Environ Toxicol Chem 18 (7):1534-1543

Hafezieh M, Ajdari D, Por AA, Hosseini SH (2014) Using Oman Sea *Sargassum illicifolium* meal for feeding white leg shrimp *Litopenaeus* *vannamei*. Iranian Journal of Fisheries Sciences 13 (1):73-80

Hemmi A, Jormalainen V (2004) Geographic covariation of chemical quality of the host alga *Fucus* *vesiculosus* with fitness of the herbivorous isopod *Idotea baltica*. Marine Biology 145 (4):759-768

Hernandez-Carmona G, Carrillo-Dominguez S, Arvizu-Higuera DL, Rodriguez-Montesinos YE, Murillo-Alvarez JI, Munoz-Ochoa M, Castillo-Dominguez RM (2009) Monthly variation in the chemical composition of *Eisenia arborea* JE Areschoug. J Appl Phycol 21 (5):607-616

Hernandez I (1996) Analysis of the expression of alkaline phosphatase activity as a measure of phosphorus status in the red alga *Porphyra* *umbilicalis* (L) Kutzing. Bot Mar 39 (3):255-262

Hernandez J, Uriarte I, Viana MT, Westermeier R, Farias A (2009) Growth performance of weaning red abalone (*Haliotis rufescens*) fed with *Macrocystis* *pyrifera* plantlets and *Porphyra* *columbina* compared with a formulated diet. Aquac Res 40 (15):1694-1702

Hofmann LC, Straub S, Bischof K (2012) Competition between calcifying and noncalcifying temperate marine macroalgae under elevated CO2 levels. Mar Ecol Prog Ser 464:89-105

Hong DD, Hien HM, Son PN (2007) Seaweeds from Vietnam used for functional food, medicine and biofertilizer. J Appl Phycol 19 (6):817-826

Horn MH, Neighbors MA (1984) Protein and Nitrogen Assimilation as a Factor in Predicting the Seasonal Macroalgal Diet of the Monkeyface Prickleback. Trans Am Fish Soc 113 (3):388-396

Hurtadoponce AQ (1995) Carrageenan Properties and Proximate Composition of 3 Morphotypes of *Kappaphycus* *alvarezii* Doty (Gigartinales, Rhodophyta) Grown at 2 Depths. Bot Mar 38 (3):215-219

Hwang EK, Amano H, Park CS (2008) Assessment of the nutritional value of *Capsosiphon* *fulvescens* (Chlorophyta): developing a new species of marine macroalgae for cultivation in Korea. J Appl Phycol 20 (2):147-151

Israel A, Gavrieli J, Glazer A, Friedlander M (2005) Utilization of flue gas from a power plant for tank cultivation of the red seaweed *Gracilaria* *cornea*. Aquaculture 249 (1-4):311-316

Jacquin AG, Donval A, Guillou J, Leyzour S, Deslandes E, Guillou M (2006) The reproductive response of the sea urchins *Paracentrotus* *lividus* (G.) and *Psammechinus* *miliaris* (L.) to a hyperproteinated macrophytic diet. J Exp Mar Biol Ecol 339 (1):43-54

Jard G, Marfaing H, Carrere H, Delgenes JP, Steyer JP, Dumas C (2013) French Brittany macroalgae screening: Composition and methane potential for potential alternative sources of energy and products. Bioresour Technol 144:492-498

Jayasankar R, Kulandaivelu G (1999) Seasonal variation in the biochemical constituents of *Gracilaria* spp. with reference to growth. Indian J Mar Sci 28 (4):464-466

Johnson RB, Kim JK, Armbruster LC, Yarish C (2014) Nitrogen allocation of *Gracilaria* *tikvahiae* grown in urbanized estuaries of Long Island Sound and New York City, USA: a preliminary evaluation of ocean farmed *Gracilaria* for alternative fish feeds. Algae 29 (3):227-235

Kaehler S, Kennish R (1996) Summer and winter comparisons in the nutritional value of marine macroalgae from Hong Kong. Bot Mar 39 (1):11-17

Kandasamy G, Karuppiah SK, Rao PVS (2012) Salt- and pH-induced functional changes in protein concentrate of edible green seaweed *Enteromorpha* species. Fisheries Science 78 (1):169-176

Kennish R (1997) Seasonal patterns of food availability: Influences on the reproductive output and body condition of the herbivorous crab Grapsus albolineatus. Oecologia 109 (2):209-218

Khairy HM, El-Shafay SM (2013) Seasonal variations in the biochemical composition of some common seaweed species from the coast of Abu Qir Bay, Alexandria, Egypt. Oceanologia 55 (2):435-452

Kim JK, Kraemer GP, Yarish C (2013) Emersion Induces Nitrogen Release and Alteration of Nitrogen Metabolism in the Intertidal Genus *Porphyra*. Plos One 8 (7)

Kopczak CD, Zimmerman RC, Kremer JN (1991) Variation in Nitrogen Physiology and Growth among Geographically Isolated Populations of the Giant-Kelp, *Macrocystis* *pyrifera* (Phaeophyta). J Phycol 27 (2):149-158

Ktita SR, Chermiti A, Mahouachi M (2010) The use of seaweeds (Ruppia maritima and Chaetomorpha linum) for lamb fattening during drought periods. Small Ruminant Res 91 (1):116-119

Kumar V, Fotedar R, Dods K (2010) Effect of inland saline water ionic profiles on growth, chemical composition and agar characteristics of *Gracilaria* *cliftonii* (Withell, Miller and Kraft 1994) under laboratory conditions. Aquac Int 18 (5):869-881

Kumari P, Kumar M, Reddy CRK, Jha B (2014) Nitrate and Phosphate Regimes Induced Lipidomic and Biochemical Changes in the Intertidal Macroalga *Ulva* *lactuca* (Ulvophyceae, Chlorophyta). Plant Cell Physiol 55 (1):52-63

Lartigue J, Sherman TD (2006) A field study of nitrogen storage and nitrate reductase activity in the estuarine macroalgae *Enteromorpha lingulata* (Chlorophyceae) and *Gelidium pusillum* (Rhodophyceae). Estuaries and Coasts 29 (4):699-708

Lightfoot DG, Raghavan GSV (1994) Combined Fields Dewatering of Seaweed (*Nereocystis* *luetkeana*). Transactions of the Asae 37 (3):899-906

Liu FL, Sun XT, Wang FJ, Wang WJ, Liang ZR, Lin ZL, Dong ZA (2014) Breeding, economic traits evaluation, and commercial cultivation of a new *Saccharina* variety "Huangguan No. 1". Aquac Int 22 (5):1665-1675

Liu JW, Dong SL (2001) Comparative studies on utilizing nitrogen capacity between two macroalgae *Gracilaria tenuistipitata* var. liui (rhodophyta) and *Ulva pertusa* (chlorophyta) I. Nitrogen storage under nitrogen enrichment and starvation. Journal of Environmental Sciences-China 13 (3):318-322

Lourenço SO, Barbarino E, De-Paula JC, Pereira LOdS, Marquez UML (2002) Amino acid composition, protein content and calculation of nitrogen-to-protein conversion factors for 19 tropical seaweeds. Phycol Res 50 (3):233-241

Madden M, Mitra M, Ruby D, Schwarz J (2012) Seasonality of Selected Nutritional Constituents of Edible Delmarva Seaweeds. J Phycol 48 (5):1289-1298

Mai K, Mercer JP, Donlon J (1994) Comparative-Studies on the Nutrition of 2 Species of Abalone, *Haliotis tuberculata* L and *Haliotis discus hannai* Ino .2. Amino-Acid-Composition of Abalone and 6 Species of Macroalgae with an Assessment of Their Nutritional-Value. Aquaculture 128 (1-2):115-130

Mallo MC, Larrea JD, Valdes-Iglesias O, Bustio I (2007) Chemical components and biomass of *Ulva* *fasciata* (Chlorophyta) in Noah coast of Havana City, Cuba. Hidrobiologica 17 (1):41-51

Mamatha BS, Namitha KK, Senthil A, Smitha J, Ravishankar GA (2007) Studies on use of *Enteromorpha* in snack food. Food Chem 101 (4):1707-1713

Mamelona J, Pelletier E (2005) Green urchin as a significant source of fecal particulate organic matter within nearshore benthic ecosystems. J Exp Mar Biol Ecol 314 (2):163-174

Manns D, Deutschle AL, Saake B, Meyer AS (2014) Methodology for quantitative determination of the carbohydrate composition of brown seaweeds (Laminariaceae). Rsc Advances 4 (49):25736-25746

Margret RJ, Kumaresan S, Mohan VR, Jasmine GI (2008) Studies on biochemical constituents of some macro algae along Tuticorin coast, Tamilnadu, India. Plant Archives 8 (1):65-68

Marinho-Soriano E, Fonseca PC, Carneiro MAA, Moreira WSC (2006) Seasonal variation in the chemical composition of two tropical seaweeds. Bioresour Technol 97 (18):2402-2406

Marinho G, Nunes C, Sousa-Pinto I, Pereira R, Rema P, Valente LMP (2013) The IMTA-cultivated Chlorophyta *Ulva* spp. as a sustainable ingredient in Nile tilapia (*Oreochromis niloticus*) diets. J Appl Phycol 25 (5):1359-1367

Marrion O, Fleurence J, Schwertz A, Gueant JL, Mamelouk L, Ksouri J, Villaume C (2005) Evaluation of protein in vitro digestibility of *Palmaria* *palmata* and *Gracilaria verrucosa*. J Appl Phycol 17 (2):99-102

Marrion O, Schwertz A, Fleurence J, Gueant JL, Villaume C (2003) Improvement of the digestibility of the proteins of the red alga *Palmaria palmata* by physical processes and fermentation. Nahrung-Food 47 (5):339-344

Marsham S, Scott GW, Tobin ML (2007) Comparison of nutritive chemistry of a range of temperate seaweeds. Food Chem 100 (4):1331-1336

Martinez B, Rico JM (2002) Seasonal variation of P content and major N pools in *Palmaria palmata* (Rhodophyta). J Phycol 38 (6):1082-1089

Martins AP, Necchi O, Colepicolo P, Yokoya NS (2011) Effects of nitrate and phosphate availabilities on growth, photosynthesis and pigment and protein contents in colour strains of *Hypnea* *musciformis* (Wulfen in Jacqu.) JV Lamour. (Gigartinales, Rhodophyta). Revista Brasileira De Farmacognosia-Brazilian Journal of Pharmacognosy 21 (2):340-348

Martins AP, Yokoya NS, Carvalho MAM, Plastino EM (2008) Effects of kinetin and nitrogen on growth rates, pigment and protein contents in wild and phycoerythrin-deficient strains of *Hypnea* *musciformis* (Rhodophyta). J Appl Phycol 20 (5):767-773

Matanjun P, Mohamed S, Mustapha NM, Muhammad K (2009) Nutrient content of tropical edible seaweeds, *Eucheuma* *cottonii*, *Caulerpa lentillifera* and *Sargassum* *polycystum*. J Appl Phycol 21 (1):75-80

McDermid KJ, Stuercke B (2003) Nutritional composition of edible Hawaiian seaweeds. J Appl Phycol 15 (6):513-524

McDermid KJ, Stuercke B, Balazs GH (2007) Nutritional composition of marine plants in the diet of the green sea turtle (*Chelonia* *mydas*) in the Hawaiian Islands. Bull Mar Sci 81 (1):55-71

Mcglathery KJ (1992) Physiological Controls on the Distribution of the Macroalga *Spyridea hypnoides* Patterns Along a Eutrophication Gradient in Bermuda. Mar Ecol Prog Ser 87 (1-2):173-182

McGlathery KJ, Pedersen MF (1999) The effect of growth irradiance on the coupling of carbon and nitrogen metabolism in *Chaetomorpha linum* (Chlorophyta). J Phycol 35 (4):721-731

McGlathery KJ, Pedersen MF, Borum J (1996) Changes in intracellular nitrogen pools and feedback controls on nitrogen uptake in *Chaetomorpha linum* (chlorophyta). J Phycol 32 (3):393-401

Mercado JM, Javier F, Gordillo L, Niell FX, Figueroa FL (1999) Effects of different levels of CO2 on photosynthesis and cell components of the red alga *Porphyra leucosticta*. J Appl Phycol 11 (5):455-461

Mercer JP, Mai KS, Donlon J (1993) Comparative-Studies on the Nutrition of 2 Species of Abalone, *Haliotis tuberculata* Linnaeus and *Haliotis discus hannai* Ino .1. Effects of Algal Diets on Growth and Biochemical-Composition. Invertebr Reprod Dev 23 (2-3):75-88

Misurcova L, Bunka F, Ambrozova JV, Machu L, Samek D, Kracmar S (2014) Amino acid composition of algal products and its contribution to RDI. Food Chem 151:120-125

Misurcova L, Kracmar S, Klejdus B, Vacek J (2010) Nitrogen Content, Dietary Fiber, and Digestibility in Algal Food Products. Czech Journal of Food Sciences 28 (1):27-35

Moreda-Pineiro J, Moreda-Pineiro A, Romaris-Hortas V, Dominguez-Gonzalez R, Alonso-Rodriguez E, Lopez-Mahia P, Muniategui-Lorenzo S, Prada-Rodriguez D, Bermejo-Barrera P (2012) Trace metals in marine foodstuff: Bioavailability estimation and effect of major food constituents. Food Chem 134 (1):339-345

Mouradigivernaud A, Givernaud T, Morvan H, Cosson J (1993) Annual Variations of the Biochemical-Composition of *Gelidium latifolium* (Greville) Thuret Et Bornet. Hydrobiologia 261:607-612

Msuya F, Neori A (2008) Effect of water aeration and nutrient load level on biomass yield, N uptake and protein content of the seaweed *Ulva lactuca* cultured in seawater tanks. J Appl Phycol 20 (6):1021-1031

Msuya FE, Neori A (2010) The Performance of Spray-Irrigated *Ulva Lactuca* (Ulvophyceae, Chlorophyta) as a Crop and as a Biofilter of Fishpond Effluents1. J Phycol 46 (4):813-817

Mulvaney WJ, Winberg PC, Adams L (2013) Comparison of macroalgal (*Ulva* and *Grateloupia* spp.) and formulated terrestrial feed on the growth and condition of juvenile abalone. J Appl Phycol 25 (3):815-824

Munier M, Dumay J, Morancais M, Jaouen P, Fleurence J (2013) Variation in the Biochemical Composition of the Edible Seaweed *Grateloupia turuturu* Yamada Harvested from Two Sampling Sites on the Brittany Coast (France): The Influence of Storage Method on the Extraction of the Seaweed Pigment R-Phycoerythrin. Journal of Chemistry

Murakami K, Yamaguchi Y, Noda K, Fujii T, Shinohara N, Ushirokawa T, Sugawa-Katayama Y, Katayama M (2011) Seasonal variation in the chemical composition of a marine brown alga, *Sargassum horneri* (Turner) C. Agardh. J Food Compos Anal 24 (2):231-236

Naldi M, Wheeler PA (1999) Changes in nitrogen pools in *Ulva fenestrata* (Chlorophyta) and *Gracilaria pacifica* (Rhodophyta) under nitrate and ammonium enrichment. J Phycol 35 (1):70-77

Navarro-Angulo L, Robledo D (1999) Effects of nitrogen source, N : P ratio and N-pulse concentration and frequency on the growth of *Gracilaria* *cornea* (Gracilariales, Rhodophyta) in culture. Hydrobiologia 399:315-320

Neighbors MA, Horn MH (1991) Nutritional Quality of Macrophytes Eaten and Not Eaten by 2 Temperate-Zone Herbivorous Fishes - a Multivariate Comparison. Marine Biology 108 (3):471-476

Nelson TA, Haberlin K, Nelson AV, Ribarich H, Hotchkiss R, Van Alstyne KL, Buckingham L, Simunds DJ, Fredrickson K (2008) Ecological and physiological controls of species composition in green macroalgal blooms. Ecology 89 (5):1287-1298

Neori A, Msuya FE, Shauli L, Schuenhoff A, Kopel F, Shpigel M (2003) A novel three-stage seaweed (*Ulva lactuca*) biofilter design for integrated mariculture. J Appl Phycol 15 (6):543-553

Neveux N, Magnusson M, Maschmeyer T, Nys R, Paul NA (2014) Comparing the potential production and value of high‐energy liquid fuels and protein from marine and freshwater macroalgae. GCB Bioenergy

Nguyen VT, Ueng JP, Tsai GJ (2011) Proximate Composition, Total Phenolic Content, and Antioxidant Activity of Seagrape (*Caulerpa lentillifera*). J Food Sci 76 (7):C950-C958

Nielsen MM, Bruhn A, Rasmussen MB, Olesen B, Larsen MM, Moller HB (2012) Cultivation of *Ulva* *lactuca* with manure for simultaneous bioremediation and biomass production. J Appl Phycol 24 (3):449-458

Norziah MH, Ching CY (2000) Nutritional composition of edible seaweed *Gracilaria changgi*. Food Chem 68 (1):69-76

O'Mahoney M, Rice O, Mouzakitis G, Burnell G (2014) Towards sustainable feeds for abalone culture: Evaluating the use of mixed species seaweed meal in formulated feeds for the Japanese abalone, *Haliotis discus hannai*. Aquaculture 430:9-16

Orduna-Rojas J, Robledo D, Dawes CJ (2002) Studies on the tropical agarophyte *Gracilaria cornea* J.Agardh (Rhodophyta, Gracilariales) from Yucatan, Mexico. I. Seasonal physiological and biochemical responses. Bot Mar 45 (5):453-458

Orozco ZGA, Sumbing JG, Lebata-Ramos MJH, Watanabe S (2014) Apparent digestibility coefficient of nutrients from shrimp, mussel, diatom and seaweed by juvenile *Holothuria scabra* Jaeger. Aquac Res 45 (7):1153-1163

Ortiz J, Romero N, Robert P, Araya J, Lopez-Hernandez J, Bozzo C, Navarrete E, Osorio A, Rios A (2006) Dietary fiber, amino acid, fatty acid and tocopherol contents of the edible seaweeds *Ulva lactuca* and *Durvillaea antarctica*. Food Chem 99 (1):98-104

Ortiz J, Uquiche E, Robert P, Romero N, Quitral V, Llanten C (2009) Functional and nutritional value of the Chilean seaweeds *Codium fragile*, *Gracilaria chilensis* and *Macrocystis pyrifera*. Eur J Lipid Sci Technol 111 (4):320-327

Paiva L, Lima E, Patarra RF, Neto AI, Baptista J (2014) Edible Azorean macroalgae as source of rich nutrients with impact on human health. Food Chem 164:128-135

Patarra R, Paiva L, Neto AI, Lima E, Baptista J (2011) Nutritional value of selected macroalgae. J Appl Phycol 23 (2):205-208

Pato LS, Martinez B, Rico JM (2011) Environmental control of the annual erect phase of *Nemalion helminthoides* (Rhodophyta) in the field. Sci Mar 75 (2):263-271

Pena-Rodriguez A, Mawhinney TP, Ricque-Marie D, Cruz-Suarez LE (2011) Chemical composition of cultivated seaweed *Ulva clathrata* (Roth) C. Agardh. Food Chem 129 (2):491-498

Peng Y, Xie EY, Zheng K, Fredimoses M, Yang XW, Zhou XF, Wang YF, Yang B, Lin XP, Liu J, Liu YH (2013) Nutritional and Chemical Composition and Antiviral Activity of Cultivated Seaweed *Sargassum* *naozhouense* Tseng et Lu. Marine Drugs 11 (1):20-32

Pereira DC, Trigueiro TG, Colepicolo P, Marinho-Soriano E (2012a) Seasonal changes in the pigment composition of natural population of *Gracilaria domingensis* (Gracilariales, Rhodophyta). Revista Brasileira De Farmacognosia-Brazilian Journal of Pharmacognosy 22 (4):874-880

Pereira R, Valente LMP, Sousa-Pinto I, Rema P (2012b) Apparent nutrient digestibility of seaweeds by rainbow trout (*Oncorhynchus* *mykiss*) and Nile tilapia (*Oreochromis* *niloticus*). Algal Research-Biomass Biofuels and Bioproducts 1 (1):77-82

Perez-Estrada CJ, Civera-Cerecedo R, Hernandez-Llamas A, Serviere-Zaragoza E (2011) Growth and biochemical composition of juvenile green abalone *Haliotis fulgens* fed rehydrated macroalgae. Aquac Nutr 17 (2):E62-E69

Peters KJ, Amsler CD, Amsler MO, McClintock JB, Dunbar RB, Baker BJ (2005) A comparative analysis of the nutritional and elemental composition of macroalgae from the western Antarctic Peninsula. Phycologia 44 (4):453-463

Pise NM, Verlecar XN, Gaikwad DK, Jagtap TG (2012) Nutraceutical properties of the marine macroalga *Gayralia oxysperma*. Bot Mar 55 (6):581-589

Polat S, Ozogul Y (2008) Biochemical composition of some red and brown macro algae from the Northeastern Mediterranean Sea. Int J Food Sci Nutr 59 (7-8):566-572

Polat S, Ozogul Y (2013) Seasonal proximate and fatty acid variations of some seaweeds from the northeastern Mediterranean coast. Oceanologia 55 (2):375-391

Prado P, Carmichael RH, Watts SA, Cebrian J, Heck KL (2012) Diet-dependent delta C-13 and delta N-15 fractionation among sea urchin *Lytechinus variegatus* tissues: implications for food web models. Mar Ecol Prog Ser 462:175-190

Ramlov F, Souza JMC, Faria AVF, Maraschin M, Horta PA, Yokoya NS (2011) Growth and accumulation of carotenoids and nitrogen compounds in *Gracilaria domingensis* (Kutz.) Sonder ex Dickie (Gracilariales, Rhodophyta) cultured under different irradiance and nutrient levels. Revista Brasileira De Farmacognosia-Brazilian Journal of Pharmacognosy 21 (2):255-261

Ramos MV, Monteiro ACO, Moreira RA, Carvalho ADFU (2000) Amino acid composition of some Brazilian seaweed species. J Food Biochem 24 (1):33-39

Renaud SM, Lambrinidis G, Luong-Van Thinh J, Parry DL (1997) Chemical composition of algae for use in *Trochus niloticus* studies. Trochus: Status, Hatchery Practice and Nutrition (79):88-96

Renaud SM, Luong-Van JT (2006) Seasonal variation in the chemical composition of tropical australian marine macroalgae. J Appl Phycol 18 (3-5):381-387

Reyes OS, Fermin AC (2003) Terrestrial leaf meals or freshwater aquatic fern as potential feed ingredients for farmed abalone *Haliotis asinina* (Linnaeus 1758). Aquac Res 34 (8):593-599

Ribeiro ALNL, Tesima KE, Souza JMC, Yokoya NS (2013) Effects of nitrogen and phosphorus availabilities on growth, pigment, and protein contents in *Hypnea cervicornis* J. Agardh (Gigartinales, Rhodophyta). J Appl Phycol 25 (4):1151-1157

Rico JM, Fernandez C (1996) Seasonal nitrogen metabolism in an intertidal population of *Gelidium* *latifolium* (Gelidiaceae, Rhodophyta). Eur J Phycol 31 (2):149-155

Rico JM, Fernandez C (1997) Ecology of *Sargassum muticum* on the North Coast of Spain .2. Physiological differences between *Sargassum muticum* and *Cystoseira nodicaulis*. Bot Mar 40 (5):405-410

Rijstenbil JW, Haritonidis S, Malea P, Seferlis M, Wijnholds JA (1998) Thiol pools and glutathione redox ratios as possible indicators of copper toxicity in the green macroalgae *Enteromorpha* spp. from the Scheldt Estuary (SW Netherlands, Belgium) and Thermaikos Gulf (Greece, N Aegean Sea). Hydrobiologia 385:171-181

Risso S, Escudero C, Belchior SE, de Portela ML, Fajardo MA (2003) Chemical composition and seasonal fluctuations of the edible green seaweed, *Monostroma* *undulatum*, Wittrock, from the Southern Argentina coast. Archivos Latinoamericanos De Nutricion 53 (3):306-311

Robledo D, Pelegrin YF (1997) Chemical and mineral composition of six potentially edible seaweed species of Yucatan. Bot Mar 40 (4):301-306

Rodde RSH, Varum KM, Larsen BA, Myklestad SM (2004) Seasonal and geographical variation in the chemical composition of the red alga *Palmaria* *palmata* (L.) Kuntze. Bot Mar 47 (2):125-133

Rohani-Ghadikolaei K, Abdulalian E, Ng WK (2012) Evaluation of the proximate, fatty acid and mineral composition of representative green, brown and red seaweeds from the Persian Gulf of Iran as potential food and feed resources. Journal of Food Science and Technology-Mysore 49 (6):774-780

Romaris-Hortas V, Bermejo-Barrera P, Moreda-Pineiro J, Moreda-Pineiro A (2012) Speciation of the bio-available iodine and bromine forms in edible seaweed by high performance liquid chromatography hyphenated with inductively coupled plasma-mass spectrometry. Anal Chim Acta 745:24-32

Rosell KG, Srivastava LM (1985) Seasonal Variations in Total Nitrogen, Carbon and Amino-Acids in *Macrocystis integrifolia* and *Nereocystis luetkeana* (Phaeophyta). J Phycol 21 (2):304-309

Rosen G, Langdon CJ, Evans F (2000) The nutritional value of Palmaria mollis cultured under different light intensities and water exchange rates for juvenile red abalone *Haliotis rufescens*. Aquaculture 185 (1-2):121-136

Ruperez P, Saura-Calixto F (2001) Dietary fibre and physicochemical properties of edible Spanish seaweeds. Eur Food Res Technol 212 (3):349-354

Sanchez-Machado DI, Lopez-Cervantes J, Lopez-Hernandez J, Paseiro-Losada P (2004) Fatty acids, total lipid, protein and ash contents of processed edible seaweeds. Food Chem 85 (3):439-444

Sanchez-Machado DI, Lopez-Cervantes J, Lopez-Hernandez J, Paseiro-Losada P, Simal-Lozano J (2003) High-performance liquid chromatographic analysis of amino acids in edible seaweeds after derivatization with phenyl isothiocyanate. Chromatographia 58 (3-4):159-163

Schaal G, Riera P, Leroux C (2010) Trophic ecology in a Northern Brittany (Batz Island, France) kelp (*Laminaria digitata*) forest, as investigated through stable isotopes and chemical assays. J Sea Res 63 (1):24-35

Schuenhoff A, Shpigel M, Lupatsch I, Ashkenazi A, Msuya FE, Neori A (2003) A semi-recirculating, integrated system for the culture of fish and seaweed. Aquaculture 221 (1-4):167-181

Senthil A, Mamatha BS, Vishwanath P, Bhat KK, Ravishankar GA (2011) Studies on development and storage stability of instant spice adjunct mix from seaweed (Eucheuma). Journal of Food Science and Technology-Mysore 48 (6):712-717

Shpigel M, Marshall A, Lupatsch I, Mercer JP, Neori A (1996) Acclimation and propagation of the abalone Haliotis tuberculata in a land-based culture system in Israel. J World Aquacult Soc 27 (4):435-442

Shpigel M, Ragg NL, Lupatsch I, Neori A (1999) Protein content determines the nutritional value of the seaweed Ulva lactuca L for the abalone *Haliotis tuberculata* L. and *H. discus hannai* Ino. J Shellfish Res 18 (1):227-233

Shuuluka D, Bolton JJ, Anderson RJ (2013) Protein content, amino acid composition and nitrogen-to-protein conversion factors of *Ulva rigida* and *Ulva* *capensis* from natural populations and *Ulva lactuca* from an aquaculture system, in South Africa. J Appl Phycol 25 (2):677-685

Smit AJ, Robertson BL, duPreez DR (1996) Influence of ammonium-N pulse concentrations and frequency, tank condition and nitrogen starvation on growth rate and biochemical composition of Gracilaria gracilis. J Appl Phycol 8 (6):473-481

Smith JL, Summers G, Wong R (2010) Nutrient and heavy metal content of edible seaweeds in New Zealand. N Z J Crop Hortic Sci 38 (1):19-28

Stadtlander T, Khalil WKB, Focken U, Becker K (2013) Effects of low and medium levels of red alga Nori (Porphyra yezoensis Ueda) in the diets on growth, feed utilization and metabolism in intensively fed Nile tilapia, *Oreochromis* *niloticus* (L.). Aquac Nutr 19 (1):64-73

Sturm EA, Horn MH (1998) Food habits, gut morphology and pH, and assimilation efficiency of the zebraperch *Hermosilla azurea*, an herbivorous kyphosid fish of temperate marine waters. Marine Biology 132 (3):515-522

Suarez-Alvarez S, Gomez-Pinchetti JL, Garcia-Reina G (2012) Effects of increased CO2 levels on growth, photosynthesis, ammonium uptake and cell composition in the macroalga *Hypnea* *spinella* (Gigartinales, Rhodophyta). J Appl Phycol 24 (4):815-823

Sun SM, Cho SY, Shin TS, Chung GH, Ahn CB, Kim D (2012) Variation in the chemical composition of *Capsosiphon fulvescens* with area and during the harvest period. J Appl Phycol 24 (3):459-465

Tabarsa M, Rezaei M, Ramezanpour Z, Waaland JR (2012a) Chemical compositions of the marine algae *Gracilaria salicornia* (Rhodophyta) and *Ulva lactuca* (Chlorophyta) as a potential food source. J Sci Food Agric 92 (12):2500-2506

Tabarsa M, Rezaei M, Ramezanpour Z, Waaland JR, Rabiei R (2012b) Fatty Acids, Amino Acids, Mineral Contents, and Proximate Composition of Some Brown Seaweeds. J Phycol 48 (2):285-292

Taboada C, Millan R, Miguez I (2010) Composition, nutritional aspects and effect on serum parameters of marine algae *Ulva rigida*. J Sci Food Agric 90 (3):445-449

Taboada MC, Millan R, Miguez MI (2013) Nutritional value of the marine algae wakame (*Undaria* *pinnatifida*) and nori (*Porphyra* *purpurea*) as food supplements. J Appl Phycol 25 (5):1271-1276

Teichberg M, Fricke A, Bischof K (2013) Increased physiological performance of the calcifying green macroalga *Halimeda opuntia* in response to experimental nutrient enrichment on a Caribbean coral reef. Aquat Bot 104:25-33

Trigui M, Gasmi L, Zouari I, Tounsi S (2013) Seasonal variation in phenolic composition, antibacterial and antioxidant activities of *Ulva rigida* (Chlorophyta) and assessment of antiacetylcholinesterase potential. J Appl Phycol 25 (1):319-328

Turan G, Tekogul H (2014) The Turkish Mezzes Formulated with Protein-Rich Green Sea Vegetable (Chlorophyta), *Ulva rigida*, Cultured in Onshore Tank System. Journal of Aquatic Food Product Technology 23 (5):447-452

Uslu L, Durmaz Y, Duyar HA, Bandarra NM (2013) Fatty Acids, alpha-Tocopherol and Proximate Composition of Four Red Macroalgae in the Sinop Bay (Turkey). Journal of Animal and Veterinary Advances 12 (1):29-33

Vadas RL, Beal B, Dowling T, Fegley JC (2000) Experimental field tests of natural algal diets on gonad index and quality in the green sea urchin, *Strongylocentrotus* *droebachiensis*: a case for rapid summer production in post-spawned animals. Aquaculture 182 (1-2):115-135

Valente LMP, Gouveia A, Rema P, Matos J, Gomes EF, Pinto IS (2006) Evaluation of three seaweeds Gracilaria bursa-pastoris, *Ulva rigida* and *Gracilaria cornea* as dietary ingredients in European sea bass (*Dicentrarchus labrax*) juveniles. Aquaculture 252 (1):85-91

Ventura MR, Castanon JIR (1998) The nutritive value of seaweed (*Ulva lactuca*) for goats. Small Ruminant Res 29 (3):325-327

Vergara JJ, Bird KT, Niell FX (1995) Nitrogen Assimilation Following Nh4+ Pulses in the Red Alga *Gracilariopsis-Lemaneiformis* - Effect on C-Metabolism. Mar Ecol Prog Ser 122 (1-3):253-263

Vergara JJ, Niell FX (1993) Effects of Nitrate Availability and Irradiance on Internal Nitrogen Constituents in *Corallina elongata* (Rhodophyta). J Phycol 29 (3):285-293

Vergara JJ, Niell FX (1995) Short-Term Variation of Internal Nitrogen-Compounds as a Function of Irradiance in *Corallina elongata*. Bot Mar 38 (4):285-290

Viera MP, de Vicose GC, Gomez-Pinchetti JL, Bilbao A, Fernandez-Palacios H, Izquierdo MS (2011) Comparative performances of juvenile abalone (*Haliotis tuberculata* coccinea Reeve) fed enriched vs non-enriched macroalgae: Effect on growth and body composition. Aquaculture 319 (3-4):423-429

Viera MP, Pinchetti JLG, de Vicose GC, Bilbao A, Suarez S, Haroun RJ, Izquierdo MS (2005) Suitability of three red macroalgae as a feed for the abalone *Haliotis tuberculata* coccinea Reeve. Aquaculture 248 (1-4):75-82

Wahbeh MI (1997) Amino acid and fatty acid profiles of four species of macroalgae from Aqaba and their suitability for use in fish diets. Aquaculture 159 (1-2):101-109

Wang QH, Dong SL, Tian XL, Wang F (2007) Effects of circadian rhythms of fluctuating temperature on growth and biochemical composition of *Ulva pertusa*. Hydrobiologia 586:313-319

Wassef EA, El-Sayed AFM, Sakr EM (2013) *Pterocladia* (Rhodophyta) and *Ulva* (Chlorophyta) as feed supplements for European seabass, *Dicentrarchus* *labrax* L., fry. J Appl Phycol 25 (5):1369-1376

Westermeier R, Gomez I (1996) Biomass, energy contents and major organic compounds in the brown alga *Lessonia nigrescens* (Laminariales, Phaeophyceae) from Mehuin, south Chile. Bot Mar 39 (6):553-559

Westermeier R, Murua P, Patino DJ, Munoz L, Ruiz A, Muller DG (2012) Variations of chemical composition and energy content in natural and genetically defined cultivars of *Macrocystis* from Chile. J Appl Phycol 24 (5):1191-1201

Wong K, Cheung PC (2001a) Influence of drying treatment on three *Sargassum* species. J Appl Phycol 13 (1):43-50

Wong KH, Cheung PCK (2000) Nutritional evaluation of some subtropical red and green seaweeds - Part I - proximate composition, amino acid profiles and some physico-chemical properties. Food Chem 71 (4):475-482

Wong KH, Cheung PCK (2001b) Nutritional evaluation of some subtropical red and green seaweeds Part II. In vitro protein digestibility and amino acid profiles of protein concentrates. Food Chem 72 (1):11-17

Xu SD, Zhang L, Wu QY, Liu XB, Wang SQ, You CH, Li YY (2011) Evaluation of dried seaweed *Gracilaria* *lemaneiformis* as an ingredient in diets for teleost fish *Siganus canaliculatus*. Aquac Int 19 (5):1007-1018

Yaich H, Garna H, Besbes S, Paquot M, Blecker C, Attia H (2011) Chemical composition and functional properties of *Ulva lactuca* seaweed collected in Tunisia. Food Chem 128 (4):895-901

Yildiz G, Celikler S, Vatan O, Dere S (2012) Determination of the Anti-Oxidative Capacity and Bioactive Compounds in Green Seaweed *Ulva Rigida* C. Agardh. International Journal of Food Properties 15 (6):1182-1189

Yildiz G, Dere E, Dere S (2014) Comparison of the Antioxidative Components of Some Marine Macroalgae from Turkey. Pak J Bot 46 (2):753-757

Yildiz G, Vatan O, Celikler S, Dere S (2011) Determination of the Phenolic Compounds and Antioxidative Capacity in Red Algae *Gracilaria* *bursa*-pastoris. International Journal of Food Properties 14 (3):496-502

You CH, Zeng FG, Wang SQ, Li YY (2014) Preference of the herbivorous marine teleost *Siganus* *canaliculatus* for different macroalgae. J Ocean Univ China 13 (3):516-522

Yu J, Yang YF (2008) Physiological and biochemical response of seaweed *Gracilaria lemaneiformis* to concentration changes of N and P. J Exp Mar Biol Ecol 367 (2):142-148

Yu ZH, Hu CQ, Sun HY, Li HP, Peng PF (2013) Pond culture of seaweed *Sargassum hemiphyllum* in southern China. Chin J Oceanol Limnol 31 (2):300-305

Yu ZH, Zhu XS, Jiang YL, Luo P, Hu CQ (2014) Bioremediation and fodder potentials of two *Sargassum* spp. in coastal waters of Shenzhen, South China. Mar Pollut Bull 85 (2):797-802

Zhang JH, Shang DR, Wang W, Jiang ZJ, Xue SY, Fang JG (2010) The potential for utilizing fouling macroalgae as feed for abalone *Haliotis discus hannai*. Aquac Res 41 (12):1770-1777

Zou DH, Gao KS (2009) Effects of elevated CO2 on the red seaweed *Gracilaria lemaneiformis* (Gigartinales, Rhodophyta) grown at different irradiance levels. Phycologia 48 (6):510-517

Zou DH, Gao KS (2014) The photosynthetic and respiratory responses to temperature and nitrogen supply in the marine green macroalga *Ulva conglobata* (Chlorophyta). Phycologia 53 (1):86-94

Zubia M, Payri CE, Deslandes E, Guezennec J (2003) Chemical composition of attached and drift specimens of *Sargassum mangarevense* and *Turbinaria ornata* (Phaeophyta : Fucales) from Tahiti, French Polynesia. Bot Mar 46 (6):562-571
